# Supplementary material for: The sensitivity determination of energetic materials from laser spark spectrometry based on physical-parameter-corrected statistical methods
Source: Royal Society of Chemistry journal article supplement (doi:10.1039/d1ja00325a), 2021-01-01
Supplement: d1ja00325a1.pdf [file d1ja00325a1.pdf]

## Supporting Information

### **Sensitivity determination of energetic materials from laser spark spectrometry based on physical parameters corrected statistically methods**

Xianshuang Wang<sup>a</sup>, Junfeng Wang<sup>b</sup>, Ying Fu<sup>c</sup>, Ruibin Liu<sup>a,\*</sup>, Yage He<sup>a</sup>, An Li<sup>a</sup>, Denan Kong<sup>a</sup>, Wei Guo<sup>a</sup>, Qinghai Shu<sup>b,\*</sup>, and Yugui Yao<sup>a,d,\*</sup>

<sup>a</sup>Key Lab of advanced optoelectronic quantum architecture and measurement (Ministry of Education), Beijing Key Lab of Nanophotonics & Ultrafine Optoelectronic Systems, School of Physics, Beijing Institute of Technology, Beijing 100081, China.

<sup>b</sup>School of Materials Science and Engineering, Beijing Institute of Technology, Beijing 100081, China. <sup>c</sup>School of Computer Science and Technology, Beijing Institute of Technology, Beijing 100081, China. <sup>d</sup>Frontiers Science Center for High Energy Material (MOE), Beijing Institute of Technology, Beijing 100081, China.

\* Correspondence author:

TEL: +86-13520398457. E-mail: liusir@bit.edu.cn (Ruibin Liu)

TEL: +86-010-68915072. E-mail: qhshu121@bit.edu.cn (Qinghai Shu)

TEL: 86-010-68918672. E-mail: ygyao@bit.edu.cn (Yugui Yao)

## Contents

**Page S3      Supplementary texts**

Typical LIPS spectra.

**Page S3      Supplementary Figure 1**

Experimental setup for laser sensitiveness test of EMs.

**Page S4      Supplementary Figure 2**

The dynamic laser-produced deflagration of sample D1.

**Page S4      Supplementary Figure 3**

Laser ignitibility. a Integral pixel intensities from time-dependent snapshots of laser-induced deflagration under the laser fluence of  $70 \text{ J/cm}^2$  for sample D1. b Dependence of the probability of ignition (P) on the energy density of laser radiation (H) for single-compound explosives. Points show the experimental data and curves are their approximations.

**Page S5      Supplementary Figure 4**

LSS System.

**Page S5      Supplementary Figure 5**

Calculation of plasma parameters. (a) Gaussian fitting of  $H\alpha$  and (b) Boltzmann plot of O.  $R^2$  represents goodness of fit.

**Page S6      Supplementary Figure 6**

The correlation between laser sensitiveness and specific heat capacity (a) and melting point (b). Red dash line marks the linear trend. (Note that sample D1, D3, D7 and D9 has no melting point and sample D8 is an outlier).

**Page S6      Supplementary Figure 7**

3D reconstructed figure of a NTO single particle by X ray microscopy.

**Page S7      Supplementary Figure 8**

Flowchart of raw data treatment and model training and predicting.

## Supplementary texts

### Typical LIPS spectra.

The main characteristic peaks including C (193.1 nm, 247.9 nm), H (656.3 nm), N (742.4 nm, 744.2 nm, 746.8 nm, 868 nm, 870.3 nm, 871.2 nm), O (unresolved triplet at 777.2 nm, 777.4 nm, 777.5 nm) as well as CN bands (358.7 nm, 388.2 nm) and weak C<sub>2</sub> band (516.5 nm) are involved. Peaks of some impurities, such as calcium and sodium are also observed. The emission from ambient argon is basically in the infrared band. All above elements are matched according to Atomic Spectra Database (ASD) of National Institute of Standards and Technology (NIST, see [https://physics.nist.gov/PhysRefData/ASD/lines\\_form.html](https://physics.nist.gov/PhysRefData/ASD/lines_form.html) ).

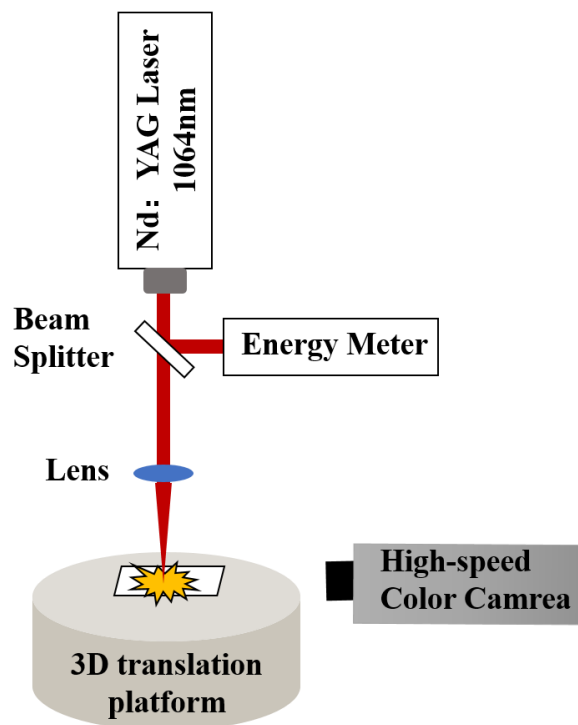

**Supplementary Figure 1.** Experimental setup for laser sensitiveness test of EMs.

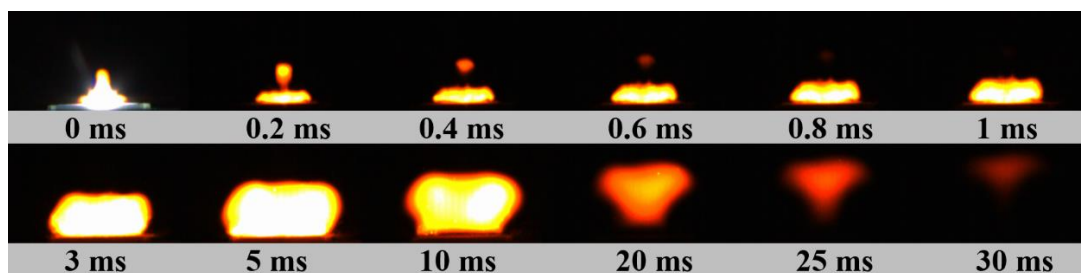

**Supplementary Figure 2.** The dynamic laser-produced deflagration of sample D1.

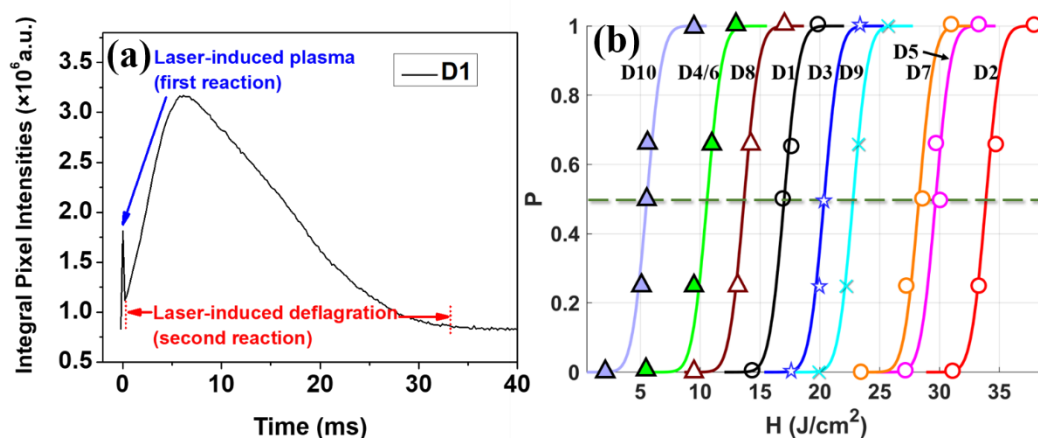

**Supplementary Figure 3.** Laser ignitability. a Integral pixel intensities from time-dependent snapshots of laser-induced deflagration under the laser fluence of  $70 \text{ J/cm}^2$  for sample D1. b Dependence of the probability of ignition ( $P$ ) on the energy density of laser radiation ( $H$ ) for single-compound explosives. Points show the experimental data and curves are their approximations.

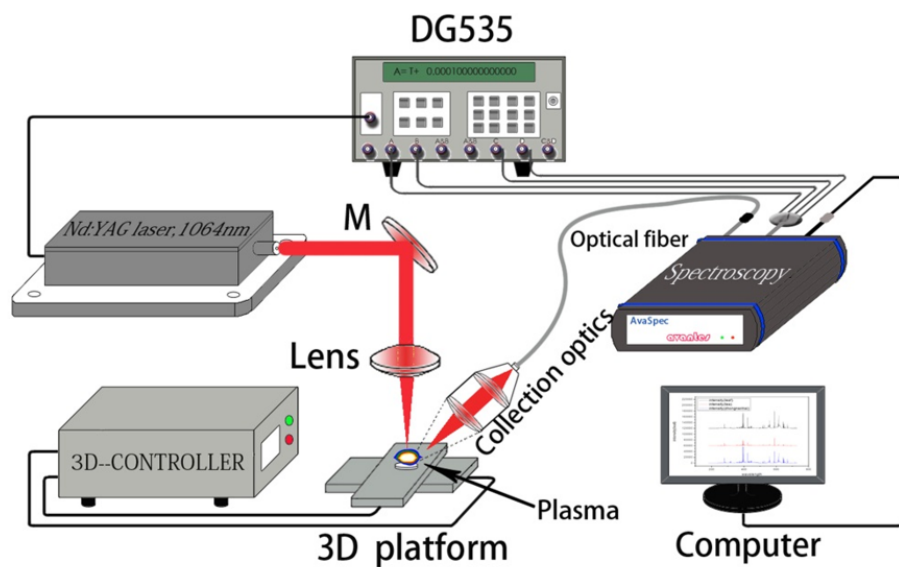

**Supplementary Figure 4.** LSS System.

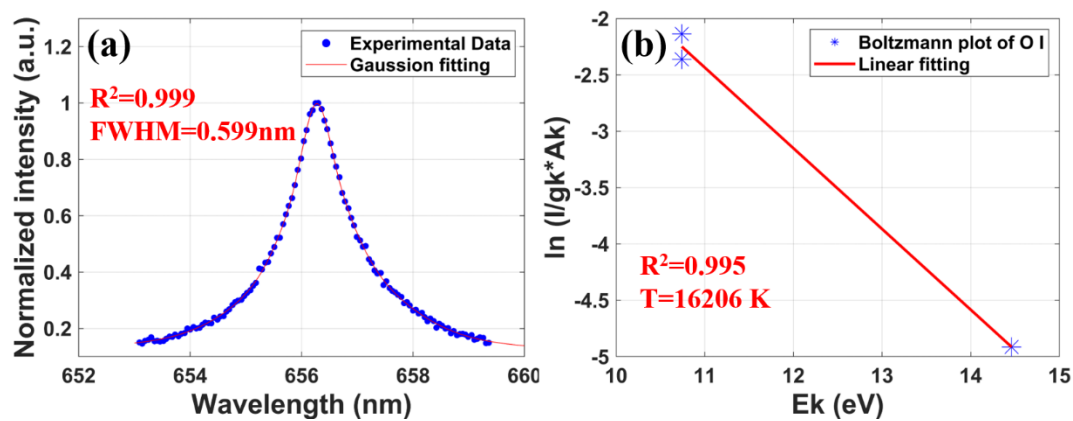

**Supplementary Figure 5.** Calculation of plasma parameters. (a) Gaussian fitting of H $\alpha$  and (b) Boltzmann plot of O.  $R^2$  represents goodness of fit.

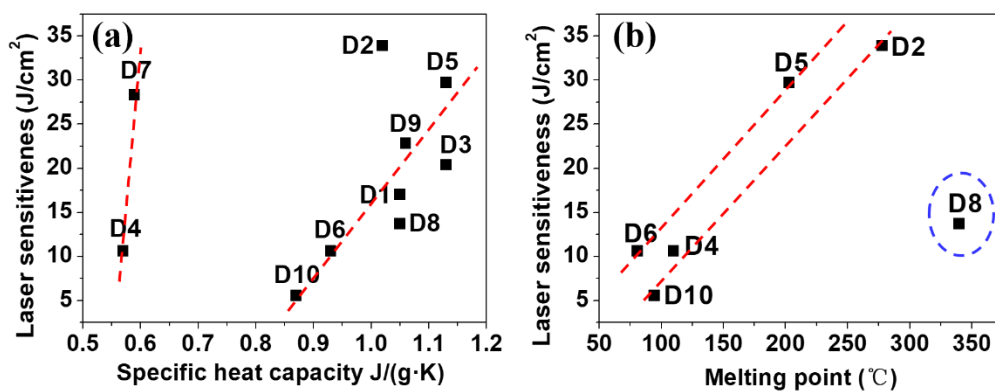

**Supplementary Figure 6.** The correlation between laser sensitiveness and specific heat capacity (a) and melting point (b). Red dash line marks the linear trend. (Note that sample D1, D3, D7 and D9 has no melting point and sample D8 is an outlier).

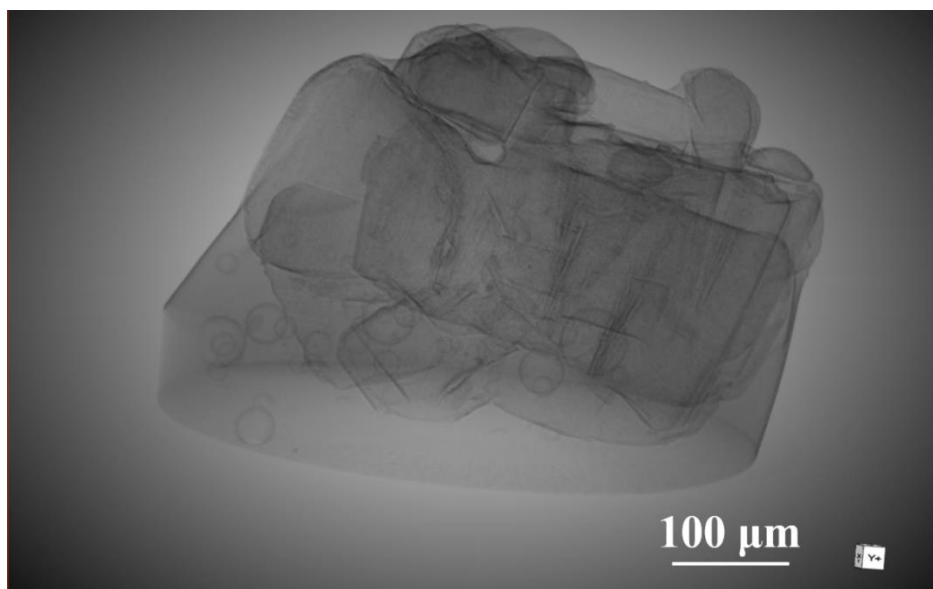

**Supplementary Figure 7.** 3D reconstructed figure of a NTO single particle by X ray microscopy.

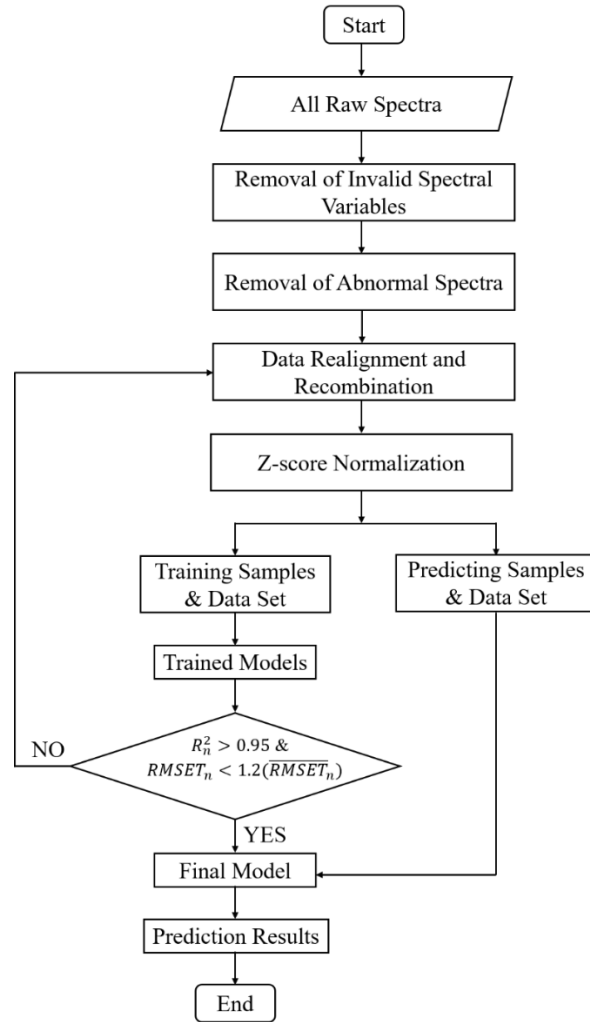

**Supplementary Figure 8.** Flowchart of raw data treatment and model training and predicting.
